# Supplementary material for: ZIF template-based Fe-doped defect-rich hierarchical structure Co3S4/MoS2 as a bifunctional electrocatalyst for overall water splitting
Source: Royal Society of Chemistry journal article supplement (doi:10.1039/d3dt02273k), 2023-01-01
Supplement: d3dt02273k1.pdf [file d3dt02273k1.pdf]

## Supplementary information

### ZIF template-based Fe doping induced defect generation in $\text{Co}_3\text{S}_4/\text{MoS}_2$ as a bifunctional electrocatalyst for Overall water splitting

Xiangyu Zhang <sup>a</sup>, Hong Li <sup>a</sup>, Yanhui Li <sup>a</sup>, Xianhui Wang <sup>b</sup>, Hongbin Wang<sup>c</sup>, Wenrong Yang<sup>d</sup>, Jingquan Liu <sup>e\*</sup> and Da Li <sup>a\*</sup> 

<sup>a</sup> College of Mechanical and Electrical Engineering, Qingdao University, Qingdao 266071, China

<sup>b</sup> School of Materials Science and Engineering, Xi'an University of Technology, Xi'an 710048, China

<sup>c</sup> School of Chemistry and Environment, Yunnan Minzu University, Kunming 650500, China

<sup>d</sup> School of Life and Environmental Science, Deakin University, Victoria, 3217, Australia

<sup>e</sup> College of Materials Science and Engineering, Qingdao University, Qingdao 266071, China

#### Corresponding Author

Email: [d.li@qdu.edu.cn](mailto:d.li@qdu.edu.cn)

[jliu@qdu.edu.cn](mailto:jliu@qdu.edu.cn)

**Preparation of  $\text{RuO}_2$  and Pt/C catalysts on cobalt foam**

RuO<sub>2</sub> and Pt/C loaded on Co foam electrodes were prepared using the procedures as follows: 8 mg RuO<sub>2</sub> or Pt/C and 30 μL 5 wt% Nafion solution were dispersed in 0.9 mL water/ethanol (V:V= 1:1) solution to afford an uniformly slurry with intense sonication for 4 h. Then the ink suspension was loaded on the surface of the bare Co foam (2 cm × 3 cm, mass loading of 0.48 mg cm<sup>-2</sup>). Finally, Pt/C and RuO<sub>2</sub> loaded on Co foam electrodes was dried at 70 °C for 12 h in an oven.

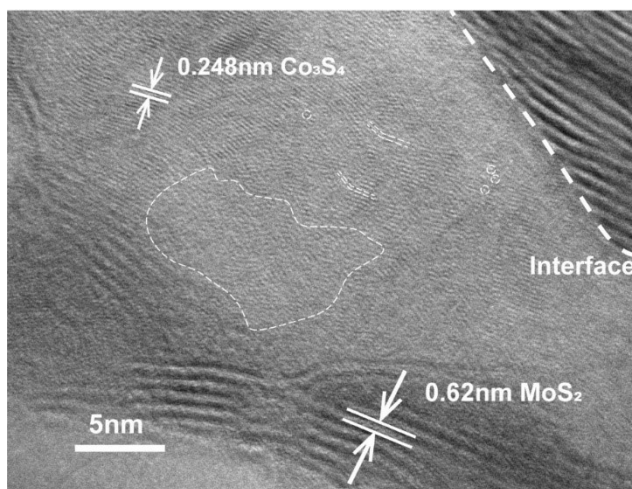

**Figure S1.** HRTEM image showing the defects (marked by the dashed lines) in Fe-Co<sub>3</sub>S<sub>4</sub>/MoS<sub>2</sub>/CF

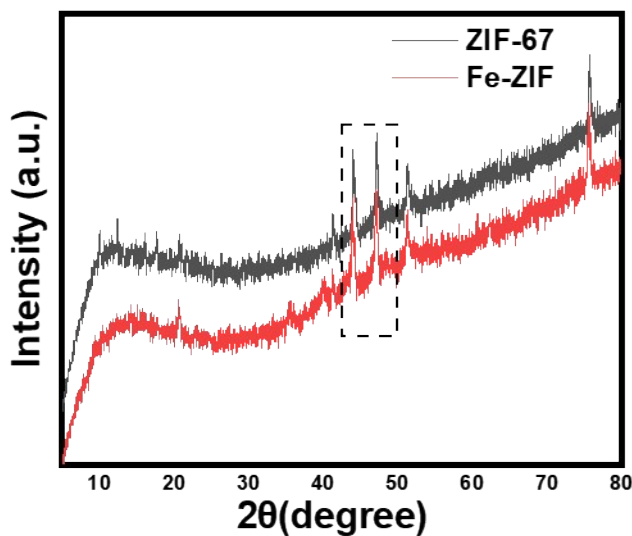

**Figure S2.** XRD patterns of the ZIF-67 before and after Fe-doping

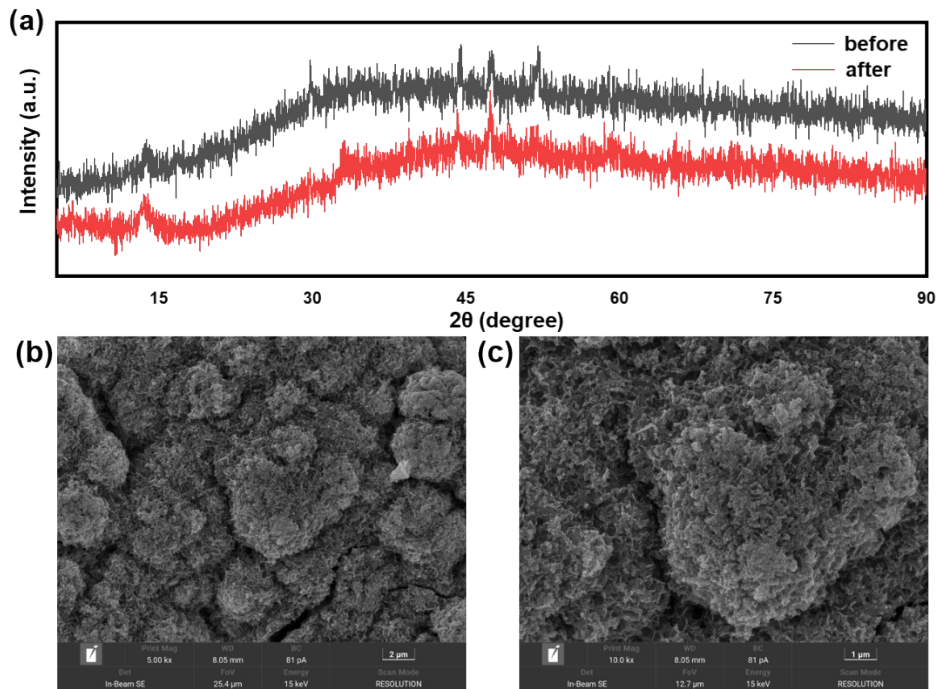

**Figure S3.** In the two-electrode electrolysis cell, (a) XRD curves of samples before and after 36 h stability test; (b, c) SEM images of samples after 36 h stability test

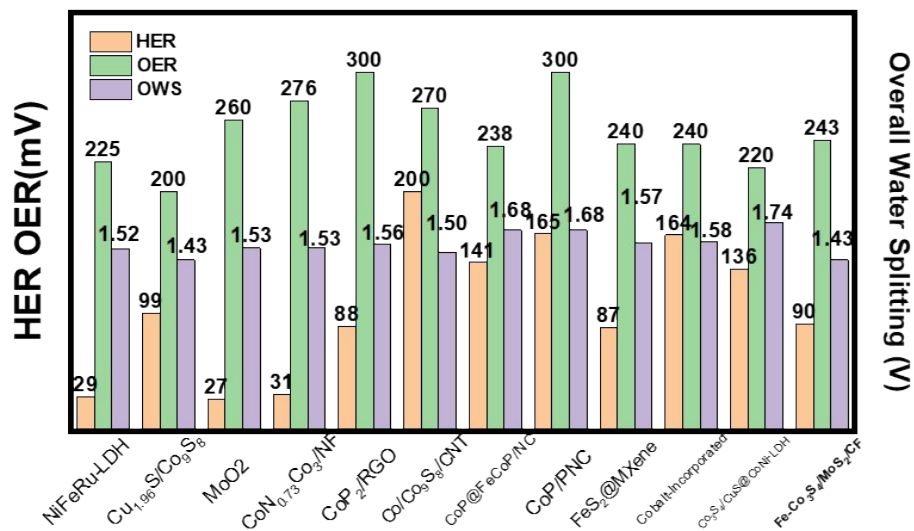

**Figure S4.** Comparison of the performance of Fe-Co<sub>3</sub>S<sub>4</sub>/MoS<sub>2</sub>/CF with that of other catalysts for water splitting

**Table S1.** Comparison of the performance of Fe-Co<sub>3</sub>S<sub>4</sub>/MoS<sub>2</sub>/CF with that of other catalysts for water splitting

| Material                                                 | Electrolyte solution                 | Reaction/J (mA cm <sup>-2</sup> ) | Potential               | Ref |
|----------------------------------------------------------|--------------------------------------|-----------------------------------|-------------------------|-----|
| NiFeRu-LDH                                               | 1 M KOH                              | HER/10; OER/10; OWS/10            | 29mV;225mV;1.52V        | 1   |
| Cu <sub>1.96</sub> S/Co <sub>9</sub> S <sub>8</sub>      | 1 M KOH                              | HER/10; OER/10; OWS/10            | 99mV;200mV;1.43V        | 2   |
| MoO <sub>2</sub> Nanosheets                              | 1 M KOH                              | HER/10; OER/10; OWS/10            | 27mV;260mV;1.53V        | 3   |
| Co/CoFeNC@N-CNF                                          | 1 M KOH                              | HER/10; OER/10;                   | 155mV;320mV             | 4   |
| Mo-doped NiSe <sub>2</sub> -CoSe <sub>2</sub>            | 1 M KOH                              | HER/10; OER/100;                  | 57mV;270mV              | 5   |
| CoP-NiCoP-Ti <sub>3</sub> C <sub>2</sub> Tx              | 1 M KOH                              | HER/10; OER/50; OWS/10            | 46mV;281mV;1.54V        | 6   |
| N-WC nanoarray                                           | 0.5 M H <sub>2</sub> SO <sub>4</sub> | HER/10; OER/60; OWS/30            | 113mV;470mV;1.7V        | 7   |
| Ni-MoN-450                                               | 1 M KOH                              | HER/10; OER/10; OWS/100           | 22mV;270mV;1.52V        | 8   |
| CoS <sub>x</sub> /Ni <sub>3</sub> S <sub>2</sub> @NF     | 1 M KOH                              | HER/10; OER/20; OWS/10            | 204mV;280mV;1.57V       | 9   |
| P-Co <sub>3</sub> O <sub>4</sub>                         | 1 M KOH                              | HER/10; OER/10; OWS/50            | 120mV;280mV;1.76V       | 10  |
| CoN <sub>0.73</sub> Co <sub>3</sub> / NF                 | 1 M KOH                              | HER/10; OER/10; OWS/10            | 31mV;276mV;1.53V        | 11  |
| CoP <sub>2</sub> /RGO                                    | 1 M KOH                              | HER/10; OER/10; OWS/10            | 88mV;300mV;1.56V        | 12  |
| Co/Co <sub>9</sub> S <sub>8</sub> /CNT                   | 1 M KOH                              | HER/10; OER/10; OWS/10            | 200mV;270mV;1.50V       | 13  |
| CoP@FeCoP/NC                                             | 1 M KOH                              | HER/10; OER/10; OWS/10            | 141mV;238mV;1.68V       | 14  |
| CoP/PNC                                                  | 1 M KOH                              | HER/10; OER/10; OWS/10            | 165mV;300mV;1.68V       | 15  |
| NiTe-HfTe <sub>2</sub> /g-C <sub>3</sub> N <sub>4</sub>  | 0.1M KOH                             | HER/10; OER/10; OWS/10            | 71mV;150mV;1.49V        | 16  |
| FeS <sub>2</sub> @MXene                                  | 1 M KOH                              | HER/10; OER/10; OWS/10            | 87mV;240mV;1.57V        | 17  |
| Cobalt-Incorporated<br>Copper Sulfide/NF                 | 1 M KOH                              | HER/10; OER/10; OWS/10            | 164mV;240mV;1.58V       | 18  |
| N-VG-CQDs                                                | 0.5 M H <sub>2</sub> SO <sub>4</sub> | HER/10; OER/10                    | 238mV;497mV             | 19  |
|                                                          | 1 M KOH                              | HER/10; OER/10                    | 218mV;383mV             |     |
| Co <sub>3</sub> S <sub>4</sub> /CuS@CoNi-LDH             | 1 M KOH                              | HER/10; OER/10; OWS/10            | 136mV;220mV;1.74V       | 20  |
| Cu <sub>x</sub> O@NiO-MoO <sub>2</sub> NRs               | 1 M KOH                              | HER/10; OER/50; OWS/10            | 65mV;321mV;1.54V        | 21  |
| MoN/MoO <sub>2</sub>                                     | 1 M KOH                              | HER/10; OER/10; OWS/10            | 38mV;309mV;1.57V        | 22  |
| <b>Fe-Co<sub>3</sub>S<sub>4</sub>/MoS<sub>2</sub>/CF</b> | <b>1M KOH</b>                        | <b>HER/10; OER/10; OWS/10</b>     | <b>90mV;243mV;1.42V</b> |     |

## References

1. G. Chen, T. Wang, J. Zhang, P. Liu, H. Sun, X. Zhuang, M. Chen and X. Feng, *Adv Mater*, 2018, **30**.
2. Y. H. Xiao, Y. Shen, D. C. Su, S. W. Zhang, J. L. Yang, D. F. Yan, S. M. Fang and X. Z. Wang, *J. Mater. Sci. Technol.*, 2023, **154**, 1-8.
3. Y. Jin, H. Wang, J. Li, X. Yue, Y. Han, P. K. Shen and Y. Cui, *Adv Mater*, 2016, **28**, 3785-3790.
4. J. J. Li, T. Y. Tan, Y. M. Xie, J. J. Chu, L. Li, B. Ouyang, E. R. Kan and W. M. Zhang, *J. Colloid Interface Sci.*, 2023, **640**, 78-90.
5. H. Liu, F. Yang, F. Chen, S. Che, N. Chen, S. Sun, N. Ta, Y. Sun, N. Wu, Y. Sun and Y. Li, *J. Colloid Interface Sci.*, 2023, **640**, 1040-1051.
6. D. Xu, Z. Kang, H. Zhao, Y. Ji, W. Yao, D. Ye and J. Zhang, *J. Colloid Interface Sci.*, 2023, **639**, 223-232.
7. N. Han, K. R. Yang, Z. Lu, Y. Li, W. Xu, T. Gao, Z. Cai, Y. Zhang, V. S. Batista, W. Liu and X. Sun, *Nat Commun*, 2018, **9**, 924.
8. Y. Liu, B. Zhou, Y. Zhang, W. Xiao, B. Li, Z. Wu and L. Wang, *J. Colloid Interface Sci.*, 2023, **637**, 104-111.
9. S. Shit, S. Chhetri, W. Jang, N. C. Murmu, H. Koo, P. Samanta and T. Kuila, *ACS Appl Mater Interfaces*, 2018, **10**, 27712-27722.
10. Z. Xiao, Y. Wang, Y.-C. Huang, Z. Wei, C.-L. Dong, J. Ma, S. Shen, Y. Li and S. Wang, *Energy & Environmental Science*, 2017, **10**, 2563-2569.
11. L. L. Zhu, C. D. Li, H. Li, H. Li, Z. Q. Wu, Y. N. Huang, X. B. Zhu and Y. P. Sun, *Journal of Materials Chemistry A*, 2022, **10**, 15520-15527.
12. J. Wang, W. Yang and J. Liu, *Journal of Materials Chemistry A*, 2016, **4**, 4686-4690.
13. A. Ashok, A. Kumar, J. Ponraj and S. A. Mansour, *Electrochimica Acta*, 2021, **368**.
14. J. Shi, F. Qiu, W. Yuan, M. Guo and Z.-H. Lu, *Chemical Engineering Journal*, 2021, **403**.
15. Z. Peng, Y. Yu, D. Jiang, Y. Wu, B. Y. Xia and Z. Dong, *Carbon*, 2019, **144**, 464-471.
16. T. Li, J. Wu, L. X. Qiao, Q. Z. Zhu, Z. G. Fu, J. Lin, J. Chen, L. Peng, B. F. Wang and Z. W. Chen, *Mater. Today Energy*, 2022, **26**, 11.
17. Y. Xie, H. Yu, L. Deng, R. S. Amin, D. Yu, A. E. Fetohi, M. Y. Maximov, L. Li, K. M. El-Khatib and S. Peng, *Inorganic Chemistry Frontiers*, 2022, **9**, 662-669.
18. N. Manivelan, S. Karuppanan and K. Prabakar, *ACS Appl Mater Interfaces*, 2022, **14**, 30812-30823.
19. R. Liu, Y. C. Tian, Z. J. Ren, X. L. Ren, K. M. Guo, H. T. Sun, F. Shaik and B. Jiang, *Colloid Surf. A-Physicochem. Eng. Asp.*, 2022, **655**, 12.
20. G. Li, P. Wang, C. Y. Li, Z. Fang, M. He, W. W. Wang, X. L. Yuan, H. Li, P. G. Li and Z. X. Li, *Mater. Res. Lett.*, 2022, **10**, 744-753.
21. J. Yang, H. Xuan, J. Yang, X. Liang, Y. Li, J. Yang and P. Han, *Journal of Alloys and Compounds*, 2023, **934**.
22. Q. X. Du, M. A. Khan, J. Zhu, H. B. Zhao, J. H. Fang, D. X. Ye and J. J. Zhang, *Chem.-Asian J.*, 2022, **17**, 10.
